# Supplementary material
Source: PubMed Central journal article supplement (PMC5772806)
Supplement: mic-162-1651-s001.pdf [file mic-162-1651-s001.pdf]

## Supplemental data

**Table S1. Plasmids used in this study**

| Plasmids | Description                                                                                               | Reference or source       |
|----------|-----------------------------------------------------------------------------------------------------------|---------------------------|
| pJN105   | <i>P. aeruginosa</i> arabinose inducible expression vector, Gm <sup>R</sup> , <i>araC-P<sub>BAD</sub></i> | (Newman & Fuqua, 1999)    |
| pJN1120  | pJN105 containing <i>tpbB</i> (PA1120)                                                                    | (Hickman & Harwood, 2008) |
| pMRLB105 | pJN105 containing <i>ml1419c</i>                                                                          | This study                |
| pMRLB108 | pJN105 containing <i>ml1419C<sub>ΔGGDEF</sub></i>                                                         | This study                |
| pMRLB109 | pET28a (Kan <sup>R</sup> , IPTG inducible, T7) containing <i>ml1419c</i>                                  | This study                |

## Figure S1

(a)

**EAL**

ML1750c 382 **E**ALV**R**WQ 401 IPVA**E** 442 NVSPV 474 **E**IT**E**N 504 **D**DFGTG 525 **K**IDKS 561 **E**GV**E**T 578 NRA**Q**G  
 ML1752c 84 **E**ALL**R**WA 103 ISLA**E** 144 NVSAR 176 **E**LT**E**N 206 **D**DFGTG 227 **K**LAGE 267 KR**V**ET 284 DAA**Q**G

(b)

| Proteins   | Active site residues |         |         |         |         |         |         |
|------------|----------------------|---------|---------|---------|---------|---------|---------|
|            | E (382)              | N (442) | E (474) | E (477) | D (504) | K (525) | E (561) |
| ML1750c    | E (84)               | N (144) | E (176) | E (179) | D (206) | K (227) | K (267) |
| MSMEG_2196 | E (384)              | N (444) | E (476) | E (479) | D (506) | K (527) | E (563) |
| Rv1354c    | E (389)              | N (449) | E (481) | E (484) | D (511) | K (532) | E (568) |
| Rv1357c    | E (89)               | N (149) | E (181) | E (184) | D (211) | K (232) | K (272) |

**Figure S1. Comparison of the active residues and positions in conserved EAL domain containing proteins from *M. leprae* TN, *M. smegmatis* mc<sup>2</sup>155, and *M. tuberculosis* H37Rv.** (a) Alignment of protein sequence containing EAL domains of *M. leprae* TN (ML1750c and ML1752c). The amino acids that contribute to PDE activity are highlighted with gray. The other known conserved amino acids surrounding the active site are in bold text (Romling *et al.*, 2013). (b) The conserved residues in proteins containing EAL domains. The position of each conserved residue is shown in parentheses. The conserved residues of the A-site in predicted EAL domains are present in all proteins as described as previously (Romling *et al.*, 2013). Interestingly, ML1752c from *M. leprae* TN and Rv1357c from *M. tuberculosis* H37Rv have K residues instead of E in the last position of predicted active sequence. However, Rv1357c has been shown to have PDE activity to convert cyclic di-GMP to pGpG in a previous study (Gupta *et al.*, 2010). Glutamic acid (E), Asparagine (N), Aspartic acid (D), Lysine (K).

**Figure S2**

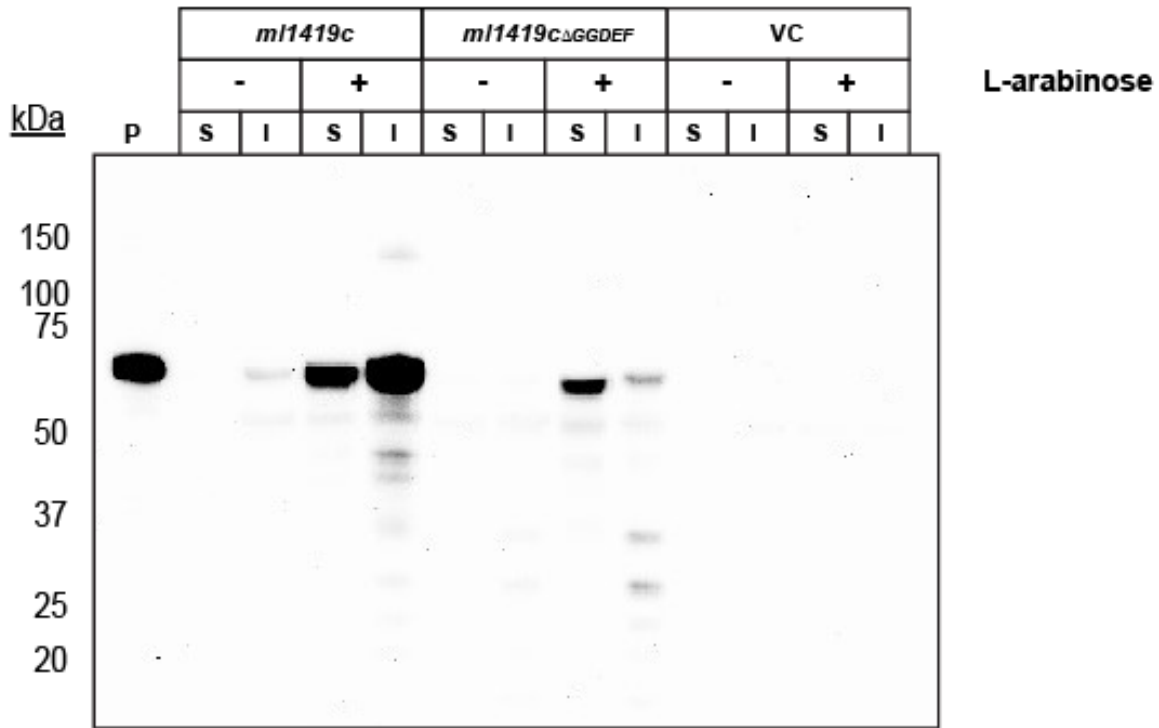

**Figure S2. Expression of *ml1419c* from *M. leprae* in subcellular fractions from *P. aeruginosa* PAO1.** Recombinant *P. aeruginosa* PAO1 containing *ml1419c*, *ml1419c*<sub>ΔGGDEF</sub>, and the vector control (VC) were grown in the presence (+) or absence (-) of 0.2% L-arabinose. Soluble (S) and insoluble (I) protein fractions (5 μg) from whole cell lysates of *P. aeruginosa* PAO1 containing *ml1419c*, *ml1419c*<sub>ΔGGDEF</sub>, and the vector control (VC) were analyzed by SDS-PAGE with Western blot. Purified recombinant ML1419c produced in *E. coli* was used as a positive control (lane P) (25 ng).

Figure S3

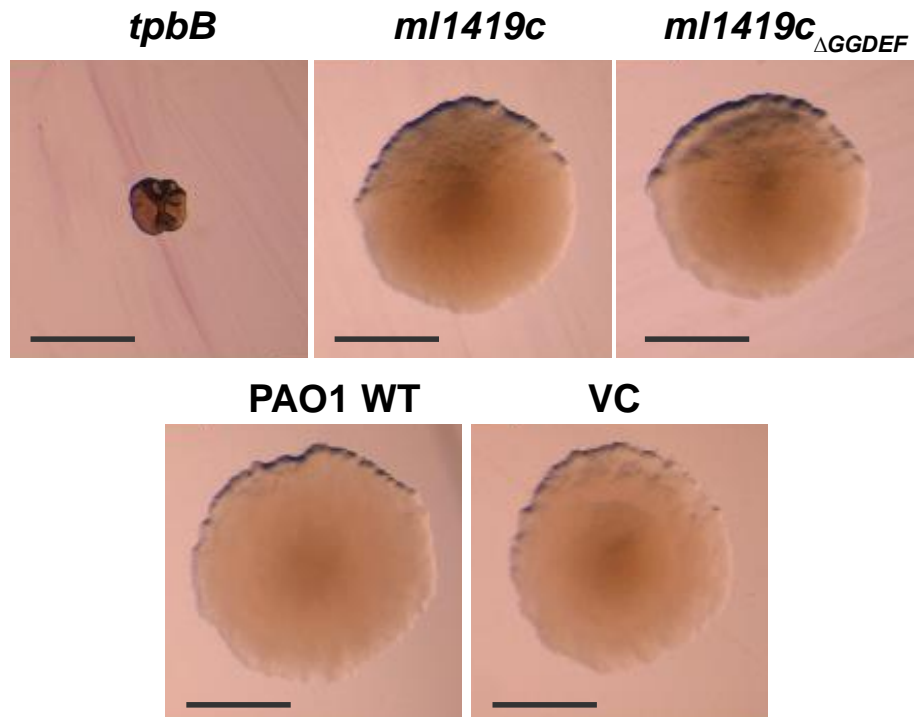

**Figure S3. Colony morphology of *P. aeruginosa* PAO1 expressing *ml1419c* grown in the absence of arabinose.** Recombinant *P. aeruginosa* PAO1 strains were grown without arabinose on VBMM agar containing Congo red, brilliant blue. Rugose colonies were observed in *P. aeruginosa* constitutively expressing *tpbB*. PAO1 wild type, *P. aeruginosa* containing arabinose inducible *ml1419c*, *ml1419c*<sub>ΔGGDEF</sub> and the vector control (VC) form round colonies with smooth surfaces. Scale bar corresponds to 1 mm.

**Figure S4**

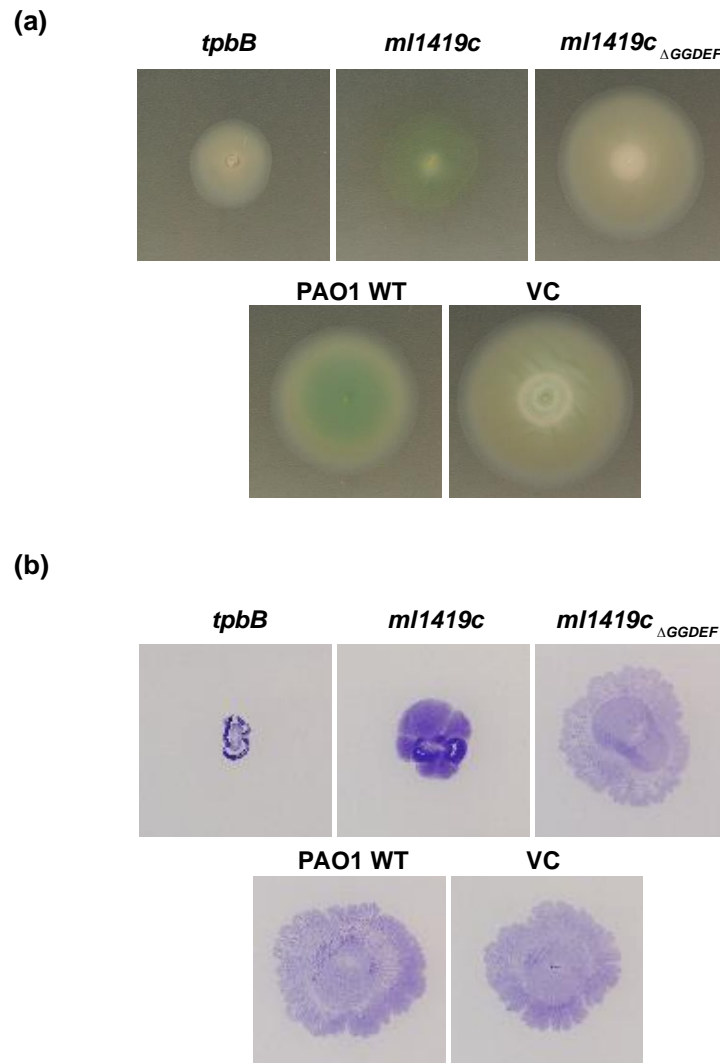

**Figure S4. Suppression of *P. aeruginosa* motility expressing *ml1419c*.** (a) Swimming and (b) twitching motility were suppressed in *P. aeruginosa* expressing *tpbB* and *ml1419c* as compared to the wild-type PAO1 strain and vector control (VC) in the presence of 0.2% L-arabinose. Twitching and swimming motility were restored in *P. aeruginosa* expressing mutated *ml1419c* (*ml1419c*<sub>ΔGGDEF</sub>).

**Figure S5**

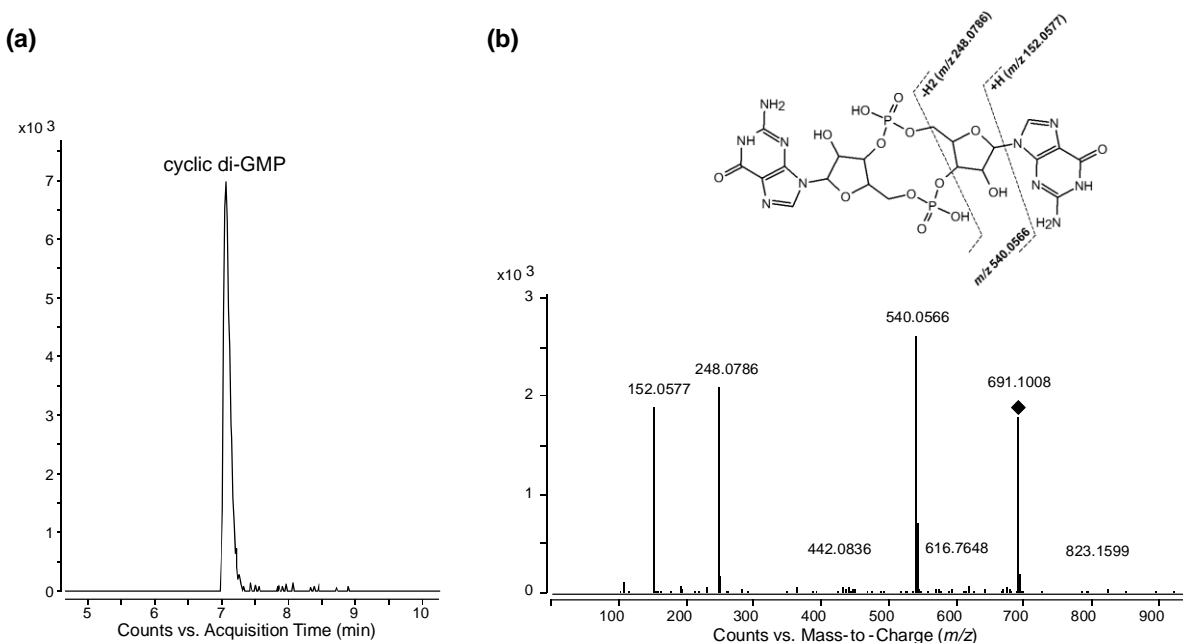

**Figure S5. Detection of cyclic di-GMP standard by LC-MS.** Cyclic di-GMP standard was separated and detected by LC-MS. (a) The extracted ion chromatogram (EIC) of cyclic di-GMP ( $m/z$  691.102) revealed a retention time of 7.061 min. (b) The cyclic di-GMP peak was confirmed by tandem mass spectrometry (LC-MS/MS) with the transition ions of  $m/z$  152.0577, 248.0786 and 540.0566. The  $m/z$  248.0786 fragment ion is diagnostic for cyclic di-GMP.

**Figure S6**

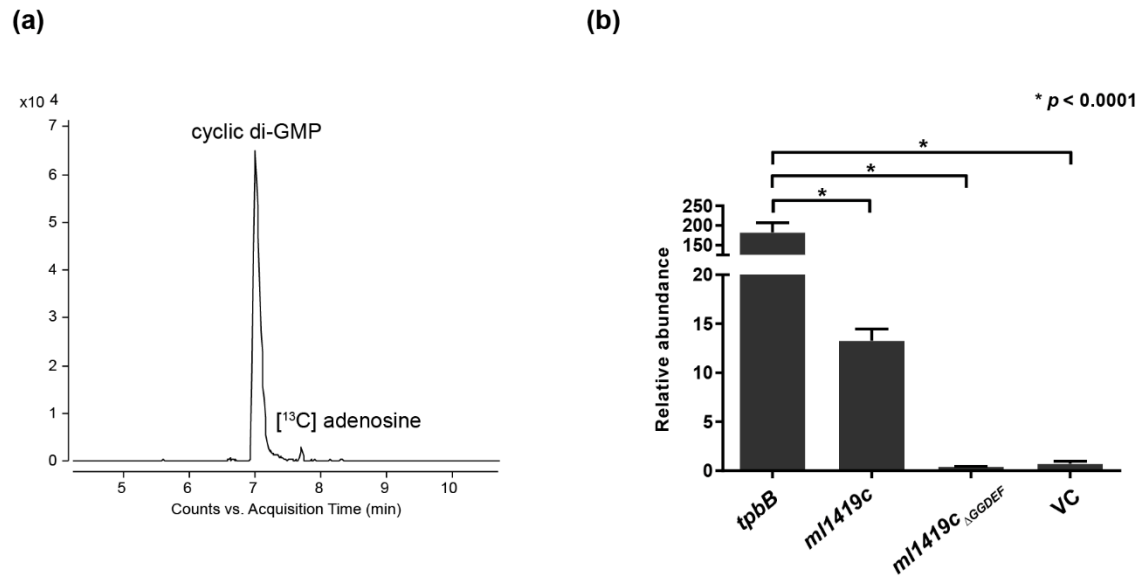

**Figure S6. Cyclic di-GMP detection by LC-MS and relative quantification of cyclic di-GMP in *P. aeruginosa* recombinant strains.** (a) The EIC of cyclic di-GMP detected in the extracts from *P. aeruginosa* expressing *tpbB*. (b) The relative quantification of cyclic di-GMP in *P. aeruginosa* expressing *tpbB* and other recombinant genes.

## References

- Gupta, K., Kumar, P. & Chatterji, D. (2010).** Identification, activity and disulfide connectivity of c-di-GMP regulating proteins in *Mycobacterium tuberculosis*. *PLoS One* **5**, (11): e15072. doi:10.1371/journal.pone.0015072.
- Hickman, J. W. & Harwood, C. S. (2008).** Identification of FleQ from *Pseudomonas aeruginosa* as a c-di-GMP-responsive transcription factor. *Mol Microbiol* **69**, 376-89.
- Newman, J. R. & Fuqua, C. (1999).** Broad-host-range expression vectors that carry the L-arabinose-inducible *Escherichia coli* *araBAD* promoter and the *araC* regulator. *Gene* **227**, 197-203.
- Romling, U., Galperin, M. Y. & Gomelsky, M. (2013).** Cyclic di-GMP: the first 25 years of a universal bacterial second messenger. *Microbiol Mol Biol Rev* **77**, 1-52.
